# Supplementary material for: Targeting anti-apoptotic pathways eliminates senescent melanocytes and leads to nevi regression
Source: PubMed Central journal article supplement (PMC9789033; doi:10.1038/s41467-022-35657-9), 2022-12-23
Supplement: 41467_2022_35657_MOESM3_ESM.pdf [file 41467_2022_35657_MOESM3_ESM.pdf]

## Reporting Summary

Nature Portfolio wishes to improve the reproducibility of the work that we publish. This form provides structure for consistency and transparency in reporting. For further information on Nature Portfolio policies, see our [Editorial Policies](#) and the [Editorial Policy Checklist](#).

### Statistics

For all statistical analyses, confirm that the following items are present in the figure legend, table legend, main text, or Methods section.

n/a Confirmed

- |                                     |                                     |                                                                                                                                                                                                                                                            |
|-------------------------------------|-------------------------------------|------------------------------------------------------------------------------------------------------------------------------------------------------------------------------------------------------------------------------------------------------------|
| <input type="checkbox"/>            | <input checked="" type="checkbox"/> | The exact sample size ( $n$ ) for each experimental group/condition, given as a discrete number and unit of measurement                                                                                                                                    |
| <input type="checkbox"/>            | <input checked="" type="checkbox"/> | A statement on whether measurements were taken from distinct samples or whether the same sample was measured repeatedly                                                                                                                                    |
| <input type="checkbox"/>            | <input checked="" type="checkbox"/> | The statistical test(s) used AND whether they are one- or two-sided<br><i>Only common tests should be described solely by name; describe more complex techniques in the Methods section.</i>                                                               |
| <input type="checkbox"/>            | <input checked="" type="checkbox"/> | A description of all covariates tested                                                                                                                                                                                                                     |
| <input type="checkbox"/>            | <input checked="" type="checkbox"/> | A description of any assumptions or corrections, such as tests of normality and adjustment for multiple comparisons                                                                                                                                        |
| <input type="checkbox"/>            | <input checked="" type="checkbox"/> | A full description of the statistical parameters including central tendency (e.g. means) or other basic estimates (e.g. regression coefficient) AND variation (e.g. standard deviation) or associated estimates of uncertainty (e.g. confidence intervals) |
| <input type="checkbox"/>            | <input checked="" type="checkbox"/> | For null hypothesis testing, the test statistic (e.g. $F$ , $t$ , $r$ ) with confidence intervals, effect sizes, degrees of freedom and $P$ value noted<br><i>Give <math>P</math> values as exact values whenever suitable.</i>                            |
| <input checked="" type="checkbox"/> | <input type="checkbox"/>            | For Bayesian analysis, information on the choice of priors and Markov chain Monte Carlo settings                                                                                                                                                           |
| <input checked="" type="checkbox"/> | <input type="checkbox"/>            | For hierarchical and complex designs, identification of the appropriate level for tests and full reporting of outcomes                                                                                                                                     |
| <input checked="" type="checkbox"/> | <input type="checkbox"/>            | Estimates of effect sizes (e.g. Cohen's $d$ , Pearson's $r$ ), indicating how they were calculated                                                                                                                                                         |

*Our web collection on [statistics for biologists](#) contains articles on many of the points above.*

### Software and code

Policy information about [availability of computer code](#)

|                 |                                                                                                                                                                                                                                                                                                                                        |
|-----------------|----------------------------------------------------------------------------------------------------------------------------------------------------------------------------------------------------------------------------------------------------------------------------------------------------------------------------------------|
| Data collection | No software was used.                                                                                                                                                                                                                                                                                                                  |
| Data analysis   | Statistical analysis was carried out with Graphpad Prism version 8. Flow cytometry data was analysed using Kaluza flow cytometry analysis software version 2.0. (Beckman). Immunoblots were analysed with ImageQuant Software TL (GE Healthcare). Nevus density and immunofluorescence images were analysed using ImageJ version 1.53. |

For manuscripts utilizing custom algorithms or software that are central to the research but not yet described in published literature, software must be made available to editors and reviewers. We strongly encourage code deposition in a community repository (e.g. GitHub). See the Nature Portfolio [guidelines for submitting code & software](#) for further information.

### Data

Policy information about [availability of data](#)

All manuscripts must include a [data availability statement](#). This statement should provide the following information, where applicable:

- Accession codes, unique identifiers, or web links for publicly available datasets
- A description of any restrictions on data availability
- For clinical datasets or third party data, please ensure that the statement adheres to our [policy](#)

Authors can confirm that all relevant data are included in this article and/or its supplementary information files. Source data are provided as a source data file. Data are available from the corresponding author (m.demaria@umcg.nl) upon reasonable request

## Human research participants

Policy information about [studies involving human research participants and Sex and Gender in Research](#).

|                             |     |
|-----------------------------|-----|
| Reporting on sex and gender | N/A |
| Population characteristics  | N/A |
| Recruitment                 | N/A |
| Ethics oversight            | N/A |

Note that full information on the approval of the study protocol must also be provided in the manuscript.

## Field-specific reporting

Please select the one below that is the best fit for your research. If you are not sure, read the appropriate sections before making your selection.

Life sciences  Behavioural & social sciences  Ecological, evolutionary & environmental sciences

For a reference copy of the document with all sections, see [nature.com/documents/nr-reporting-summary-flat.pdf](https://www.nature.com/documents/nr-reporting-summary-flat.pdf)

## Life sciences study design

All studies must disclose on these points even when the disclosure is negative.

|                 |                                                                                                                                               |
|-----------------|-----------------------------------------------------------------------------------------------------------------------------------------------|
| Sample size     | Sample sizes are based on previous experiments where typically three to four independent samples are required for statistical purposes.       |
| Data exclusions | No data were excluded.                                                                                                                        |
| Replication     | All experiments were reproduced and independent numbers of experiments are written in each figure legend.                                     |
| Randomization   | Animals were randomly assigned for each treatment group.                                                                                      |
| Blinding        | Quantifications from immunohistochemistry and immunofluorescence experiments were blinded and analyzed by an independent second investigator. |

## Reporting for specific materials, systems and methods

We require information from authors about some types of materials, experimental systems and methods used in many studies. Here, indicate whether each material, system or method listed is relevant to your study. If you are not sure if a list item applies to your research, read the appropriate section before selecting a response.

### Materials & experimental systems

|                                     |                                                                 |
|-------------------------------------|-----------------------------------------------------------------|
| n/a                                 | Included in the study                                           |
| <input type="checkbox"/>            | <input checked="" type="checkbox"/> Antibodies                  |
| <input type="checkbox"/>            | <input checked="" type="checkbox"/> Eukaryotic cell lines       |
| <input checked="" type="checkbox"/> | <input type="checkbox"/> Palaeontology and archaeology          |
| <input type="checkbox"/>            | <input checked="" type="checkbox"/> Animals and other organisms |
| <input checked="" type="checkbox"/> | <input type="checkbox"/> Clinical data                          |
| <input checked="" type="checkbox"/> | <input type="checkbox"/> Dual use research of concern           |

### Methods

|                                     |                                                    |
|-------------------------------------|----------------------------------------------------|
| n/a                                 | Included in the study                              |
| <input checked="" type="checkbox"/> | <input type="checkbox"/> ChIP-seq                  |
| <input type="checkbox"/>            | <input checked="" type="checkbox"/> Flow cytometry |
| <input checked="" type="checkbox"/> | <input type="checkbox"/> MRI-based neuroimaging    |

## Antibodies

|                 |                                                                                                                                                                                                                                                                                                                                                                                                                                                                                                                                            |
|-----------------|--------------------------------------------------------------------------------------------------------------------------------------------------------------------------------------------------------------------------------------------------------------------------------------------------------------------------------------------------------------------------------------------------------------------------------------------------------------------------------------------------------------------------------------------|
| Antibodies used | <p>Bcl-2, Cell Signalling Technology, Cat#15071, Clone#124<br/>         Bcl-xL, Cell Signalling Technology, Cat#2764, Clone#54H6, Lot#9<br/>         Bcl-w, Cell Signalling Technology, Cat#2724, Clone#31H4, Lot#5<br/>         Mcl-1, Cell Signalling Technology, Cat#94296, Clone#D2W9E, Lot#1<br/>         Mcl-1, Cell Signalling Technology, Cat#sc-12756, Clone#22, Lot#D0318<br/>         p-p70s6K, Cell Signalling Technology, Cat#9234, Clone#108D2, Lot#12<br/>         p70S6K, Cell Signalling Technology, Cat#9202, Lot#20</p> |
|-----------------|--------------------------------------------------------------------------------------------------------------------------------------------------------------------------------------------------------------------------------------------------------------------------------------------------------------------------------------------------------------------------------------------------------------------------------------------------------------------------------------------------------------------------------------------|

Vinculin, Sigma-Aldrich, Cat#V9131, Clone#hVIN-1  
 Bcl-w, Proteintech, Cat#16026-1-AP  
 MelanA, Abcam, Cat#ab210546, Clone#EPR20380, Lot#GR303449-4  
 MelanA/MART(NCL-L-MelanA), Leica Biosystems, Cat#PA0233, Clone#A103  
 $\beta$ -Actin, Cell Signalling Technology, Cat#3700, Clone#8H10D10  
 BRAFV600E, Signal-Aldrich, Cat#SAB5600047, Clone#RM8

Validation

Antibody validation can be found on the manufacturer's website.

## Eukaryotic cell lines

Policy information about [cell lines and Sex and Gender in Research](#)

Cell line source(s) Melanocytes and IMR-90 fibroblasts were both obtained from ATCC.

Authentication Cells were authenticated by the ATCC.

Mycoplasma contamination Cell lines were regularly tested negative for mycoplasma.

Commonly misidentified lines (See [ICLAC](#) register) No commonly misidentified cell lines were used.

## Animals and other research organisms

Policy information about [studies involving animals; ARRIVE guidelines](#) recommended for reporting animal research, and [Sex and Gender in Research](#)

Laboratory animals B6.Cg-Tg(Tyr-cre/ERT2)13Bos/J animals were obtained from the Jackson laboratory. BRAFV600E mice were obtained from Christian Blank (Netherlands Cancer Institute). Animals were bred to obtain required genotypes. Male, nine week old mice were used.

Wild animals No wild animals were used.

Reporting on sex Only males were used as females do not induce hyperpigmented lesions at similar rates.

Field-collected samples Field-collected animals were not used.

Ethics oversight This study was approved by the Animal Welfare body in the University Medical Centre Groningen.

Note that full information on the approval of the study protocol must also be provided in the manuscript.

## Flow Cytometry

### Plots

Confirm that:

- The axis labels state the marker and fluorochrome used (e.g. CD4-FITC).
- The axis scales are clearly visible. Include numbers along axes only for bottom left plot of group (a 'group' is an analysis of identical markers).
- All plots are contour plots with outliers or pseudocolor plots.
- A numerical value for number of cells or percentage (with statistics) is provided.

### Methodology

Sample preparation Treated melanocytes were processed as described in the Dead Cell Apoptosis Kit with Annexin V (ThermoFisher Scientific).

Instrument BD FACSCanto II

Software Kaluza Flow cytometry analysis software.

Cell population abundance Early apoptotic cells were defined by cells displaying high annexin V and low PI fluorescence. Late apoptotic cells were defined as cells displaying high annexin V and high PI fluorescence. Viable cells were defined as cells displaying low Annexin V and low PI levels.

Gating strategy FSC/SSC gates were first made to exclude cellular debris (low FSC/SSC). Gated cells were then analyzed for Annexin V and PI levels.

- Tick this box to confirm that a figure exemplifying the gating strategy is provided in the Supplementary Information.
