# Supplementary material for: Targeting anti-apoptotic pathways eliminates senescent melanocytes and leads to nevi regression
Source: Nat Commun. 2022 Dec 23;13:7923. doi: 10.1038/s41467-022-35657-9 (PMC9789033; doi:10.1038/s41467-022-35657-9)
Supplement: Supplementary file 1 — Supplementary Information [file 41467_2022_35657_MOESM1_ESM.pdf]

**Targeting anti-apoptotic pathways eliminates senescent melanocytes and leads to nevi regression**

Jaskaren Kohli<sup>1</sup>, Chen Ge<sup>1</sup>, Eleni Fitsiou<sup>1</sup>, Miriam Doepner<sup>2</sup>, Simone M. Brandenburg<sup>1</sup>, William J. Faller<sup>3</sup>, Todd W. Ridky<sup>2</sup>, Marco Demaria<sup>1,\*</sup>

<sup>1</sup> European Research Institute for the Biology of Ageing; University Medical Center Groningen; Groningen, 9713 AV; Netherlands

<sup>2</sup> Department of Dermatology, Perelman School of Medicine, University of Pennsylvania, Philadelphia, PA 19104; USA

<sup>3</sup> Netherlands Cancer Institute; Amsterdam, 1066 CX; Netherlands

\* Correspondence: [m.demaria@umcg.nl](mailto:m.demaria@umcg.nl)

**Supplementary figures 1-4**

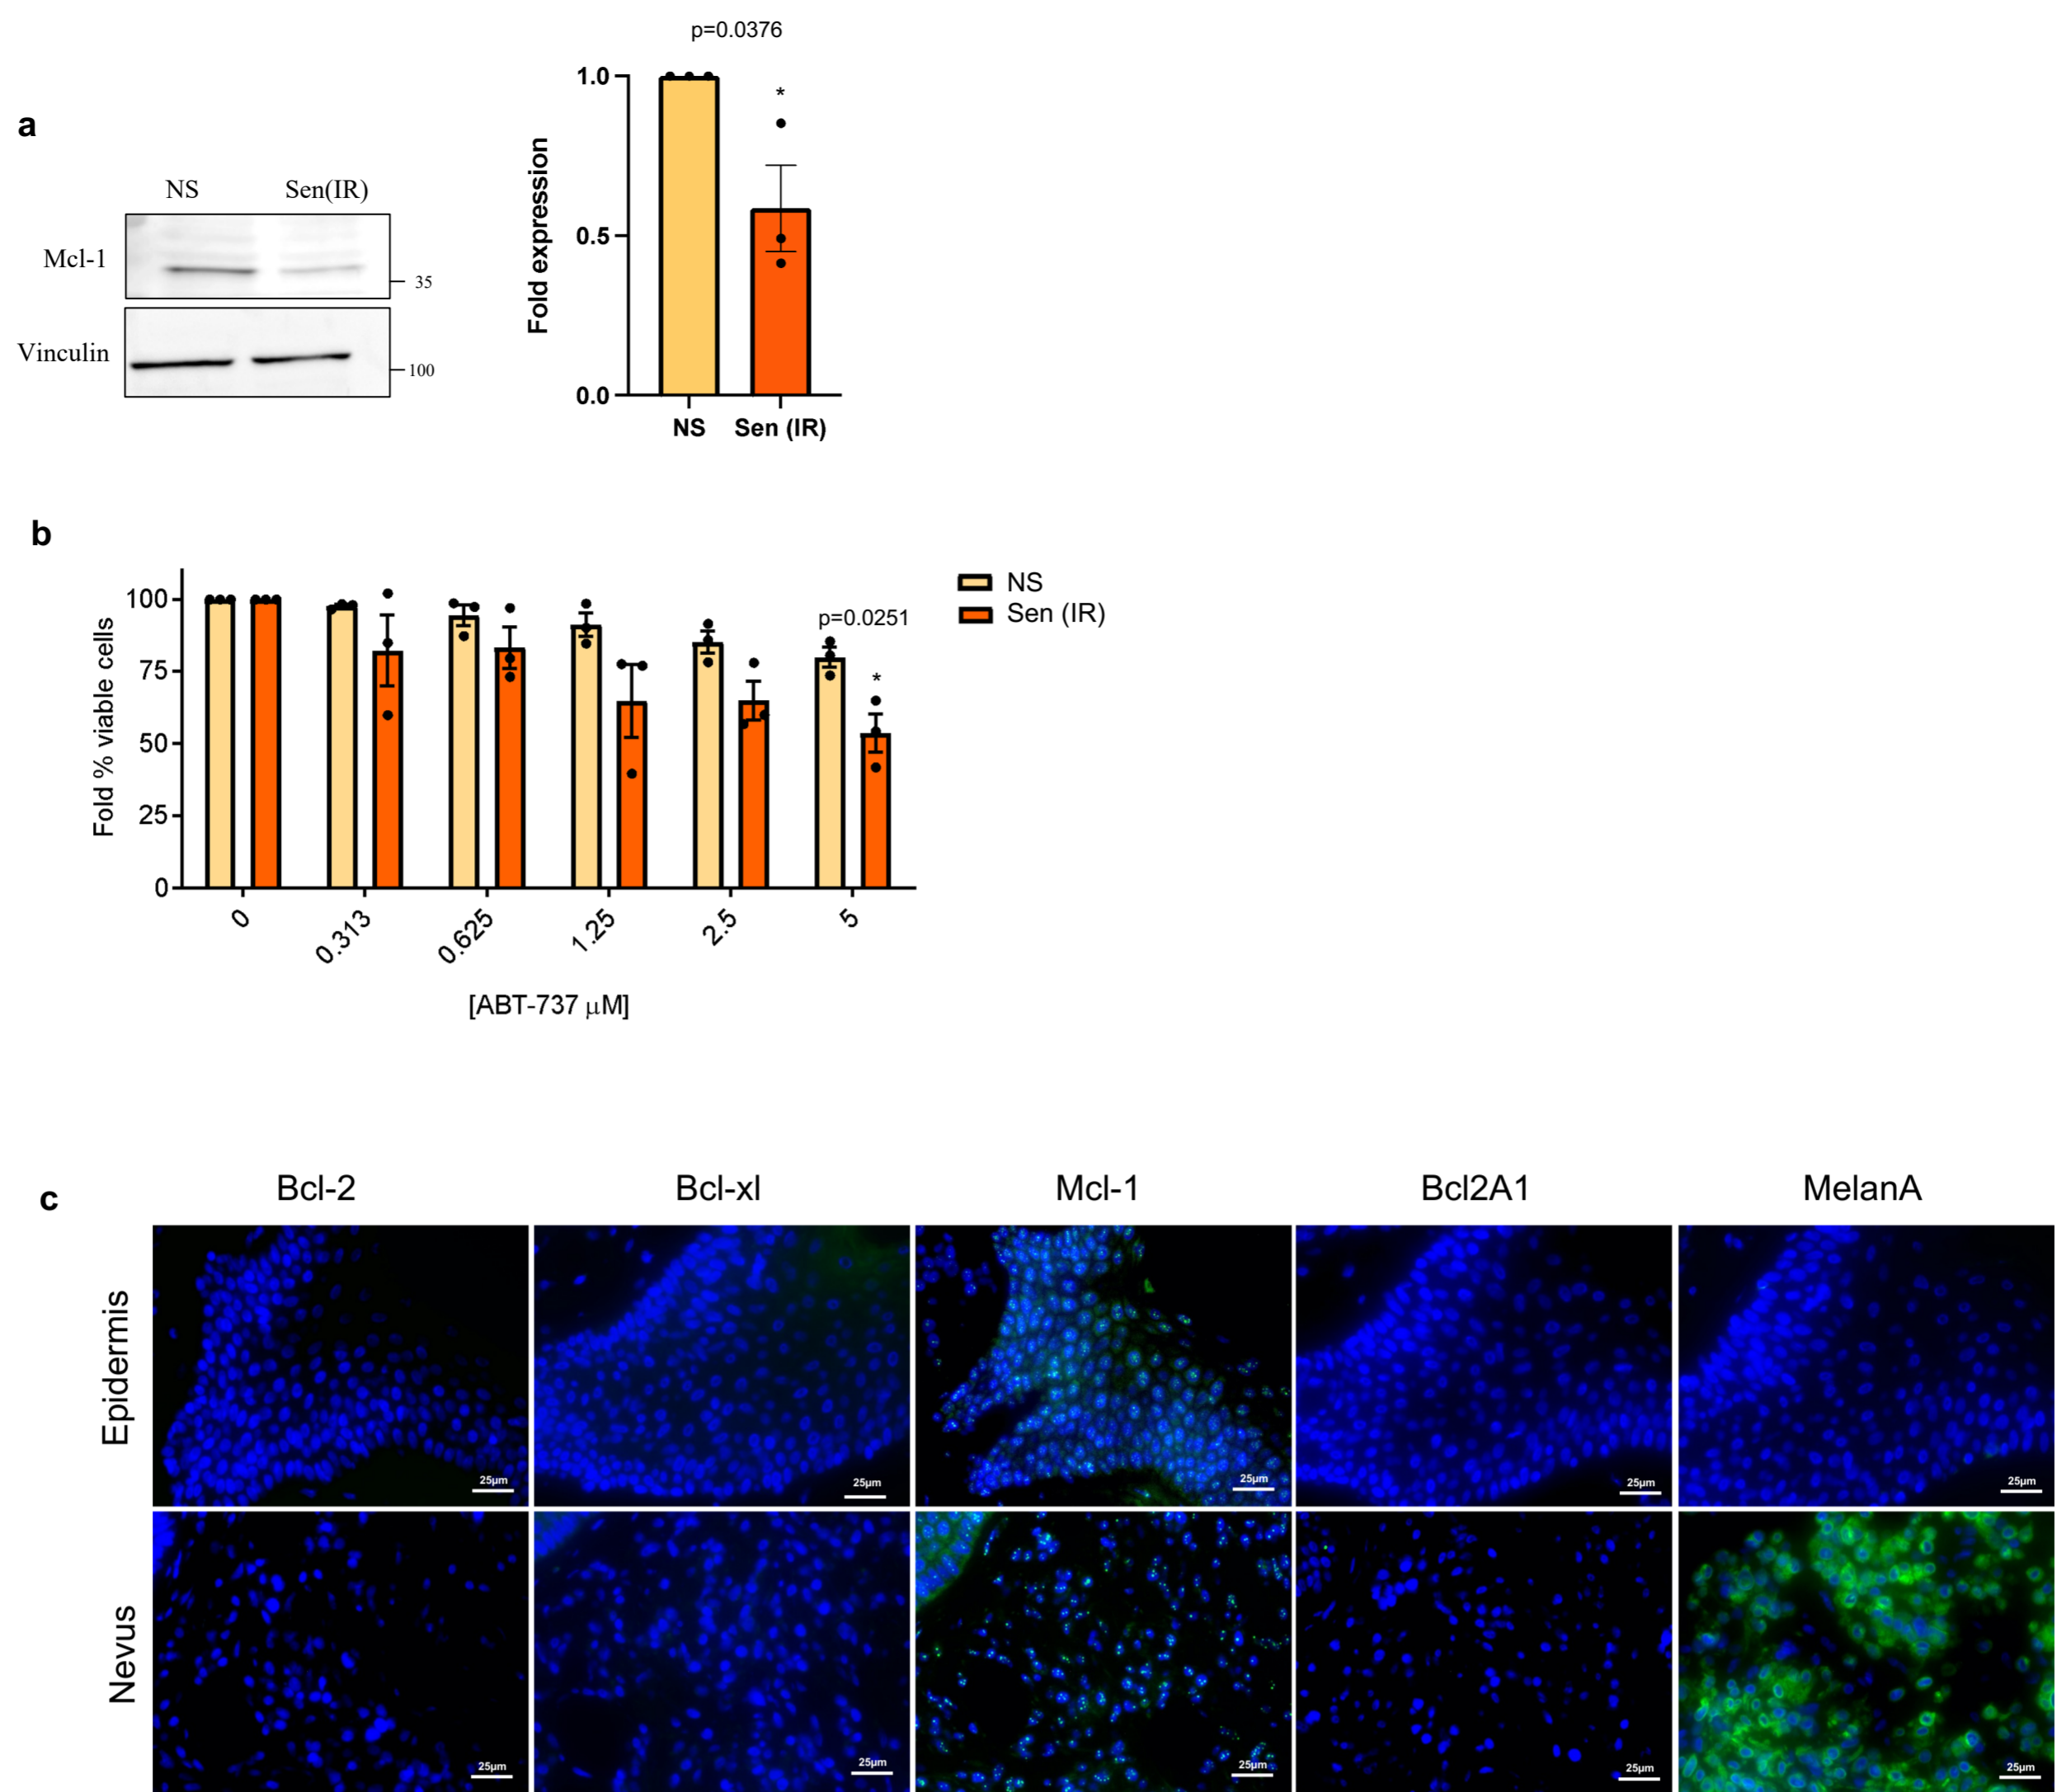

**Supplementary Figure 1 (supporting Figure 1). Senescent melanocytes are resistant to ABT-737.** (A) Protein expression and densitometry analysis of Mcl-1 from irradiated melanocytes. Vinculin was used as a housekeeping protein and expression was normalised to protein levels in non-irradiated non-senescent cells. (B) Viability of non-irradiated (NS) and irradiated (Sen IR) melanocytes treated with indicated concentrations of ABT-737 for 24 hours. Viability was normalised to untreated cells. (C) Immunofluorescence of Bcl-2, Bcl-xl, Mcl-1 and Bcl2A1 positive cells in human nevi. Melan-a was used to confirm identification of melanocytes or nevus cells, Scale bar = 25  $\mu$ M. For (A), (B) and (C), n = 3 independent experiments. Error bars = S.E.M. \* $p<0.05$ . For (A) and (B), a two-tailed student's t-test was used.

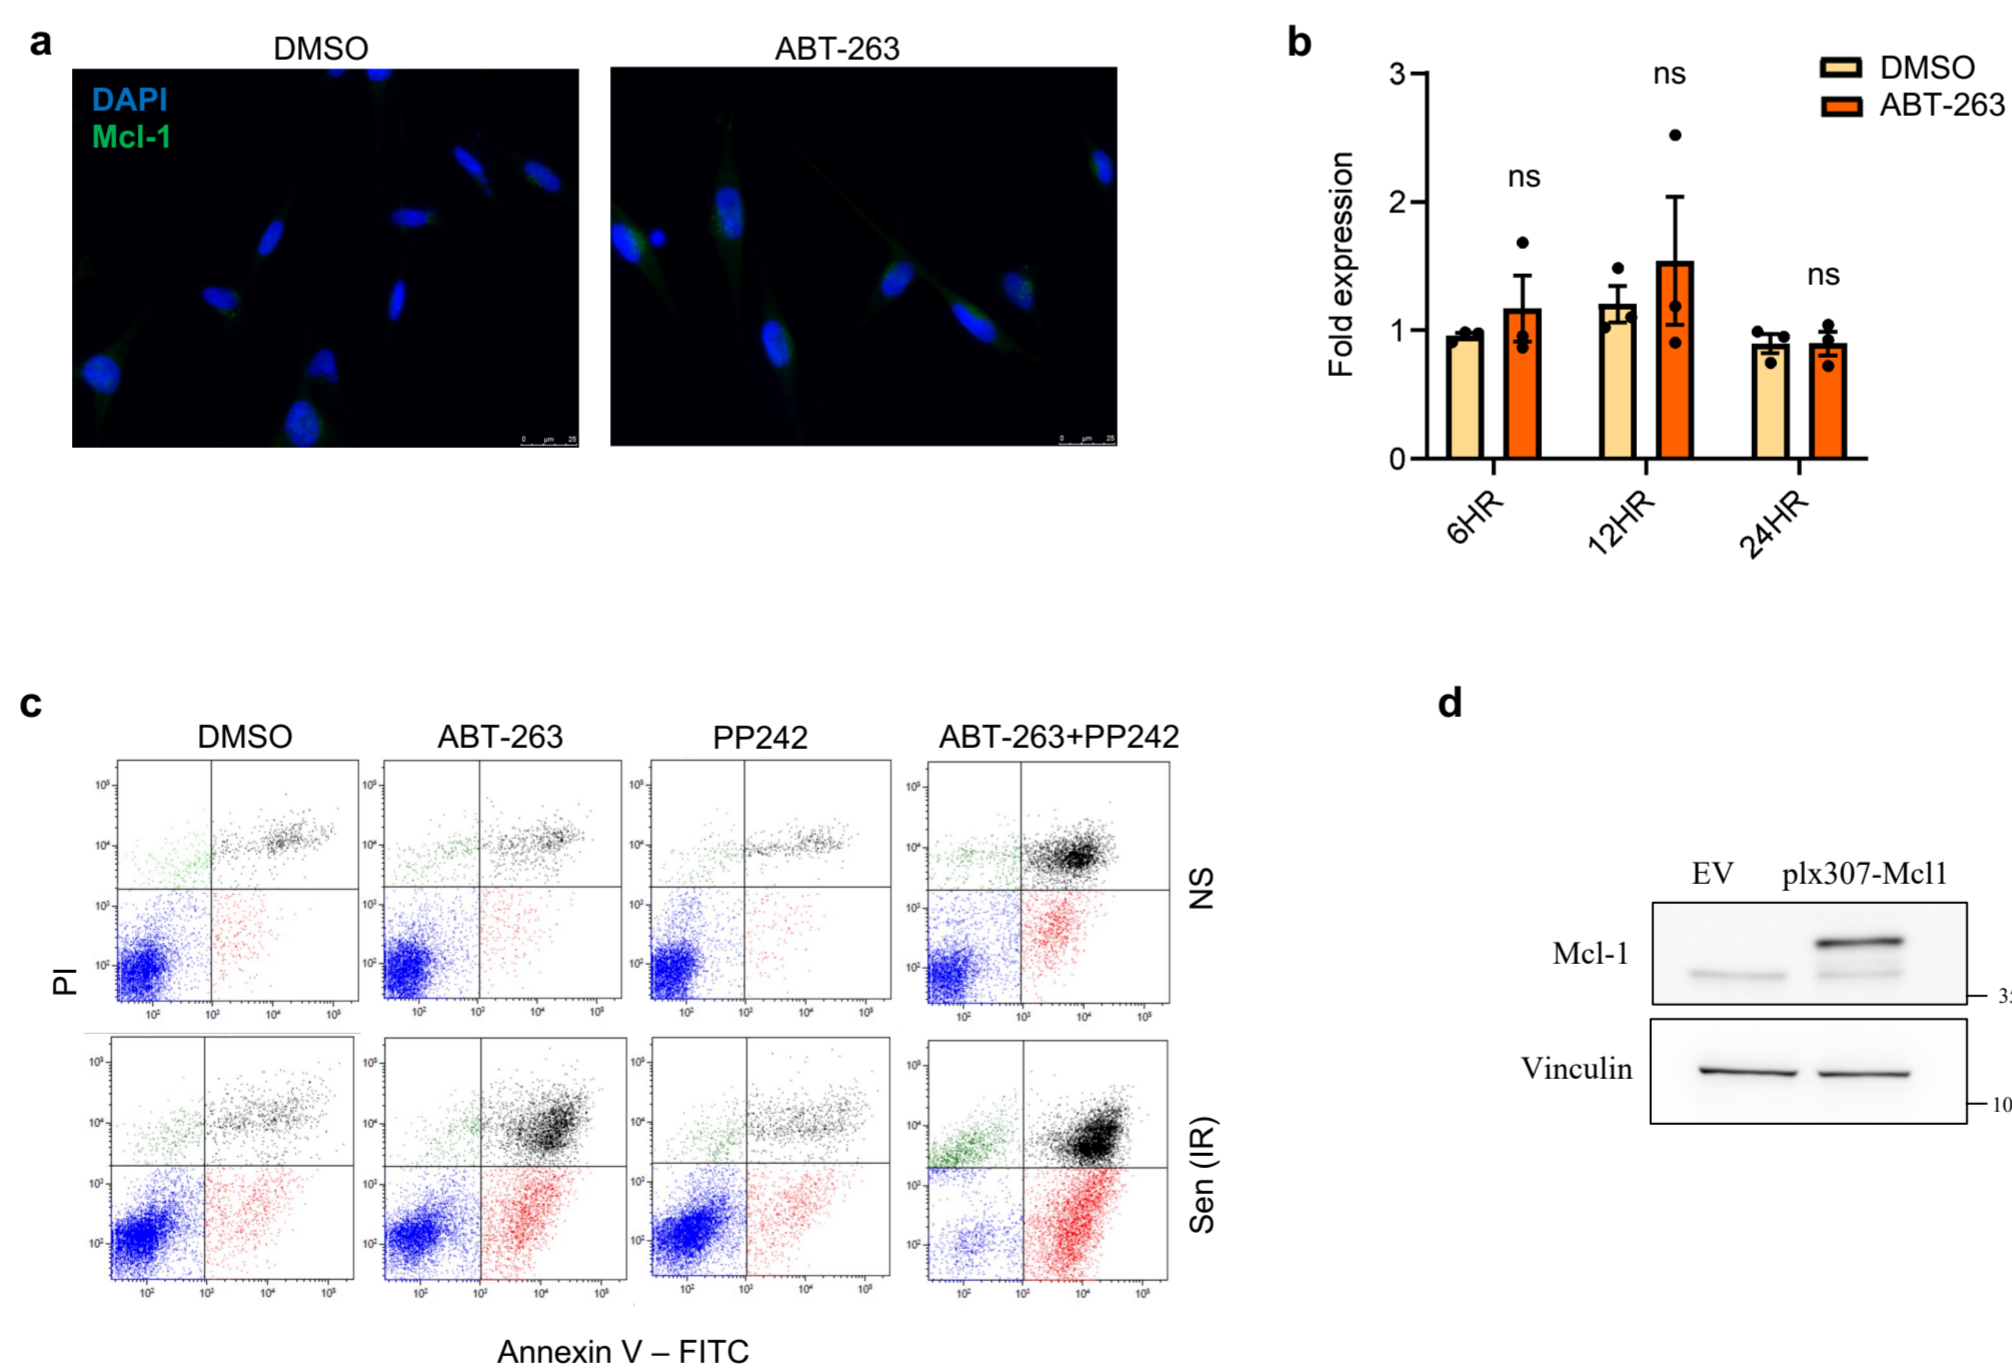

**Supplementary Figure 2 (supporting Figure 2). Pharmacological inhibition of mTOR inhibits Mcl-1 mediated resistance to ABT-263 in senescent melanocytes.** (A) Representative immunofluorescence of Mcl-1 in senescent melanocytes treated for 24 hours with DMSO or ABT-263, Scale bar = 25  $\mu$ M. Quantification can be found in figure 2c. (B) mRNA analysis of *Mcl-1* from irradiated melanocytes treated with DMSO or 5 $\mu$ M ABT-263 for 6, 12 or 24 hours. Expression was normalised using Cq values of *tubulin*. n = 3 independent experiments. (C) Annexin V/Pi flow cytometric analysis of non-senescent (NS) and senescent (Sen IR) melanocytes treated with DMSO, 5  $\mu$ M ABT-263, 1  $\mu$ M PP242, or 2.5  $\mu$ M ABT-263/1  $\mu$ M PP242 for 24 hours. (D) Immunoblot confirming Mcl-1 overexpression in melanocytes transduced with a plx307-Mcl1 vector compared to empty vector (EV) transduced cells. Error bars = S.E.M. For (B), a two-tailed student's t-test was used.

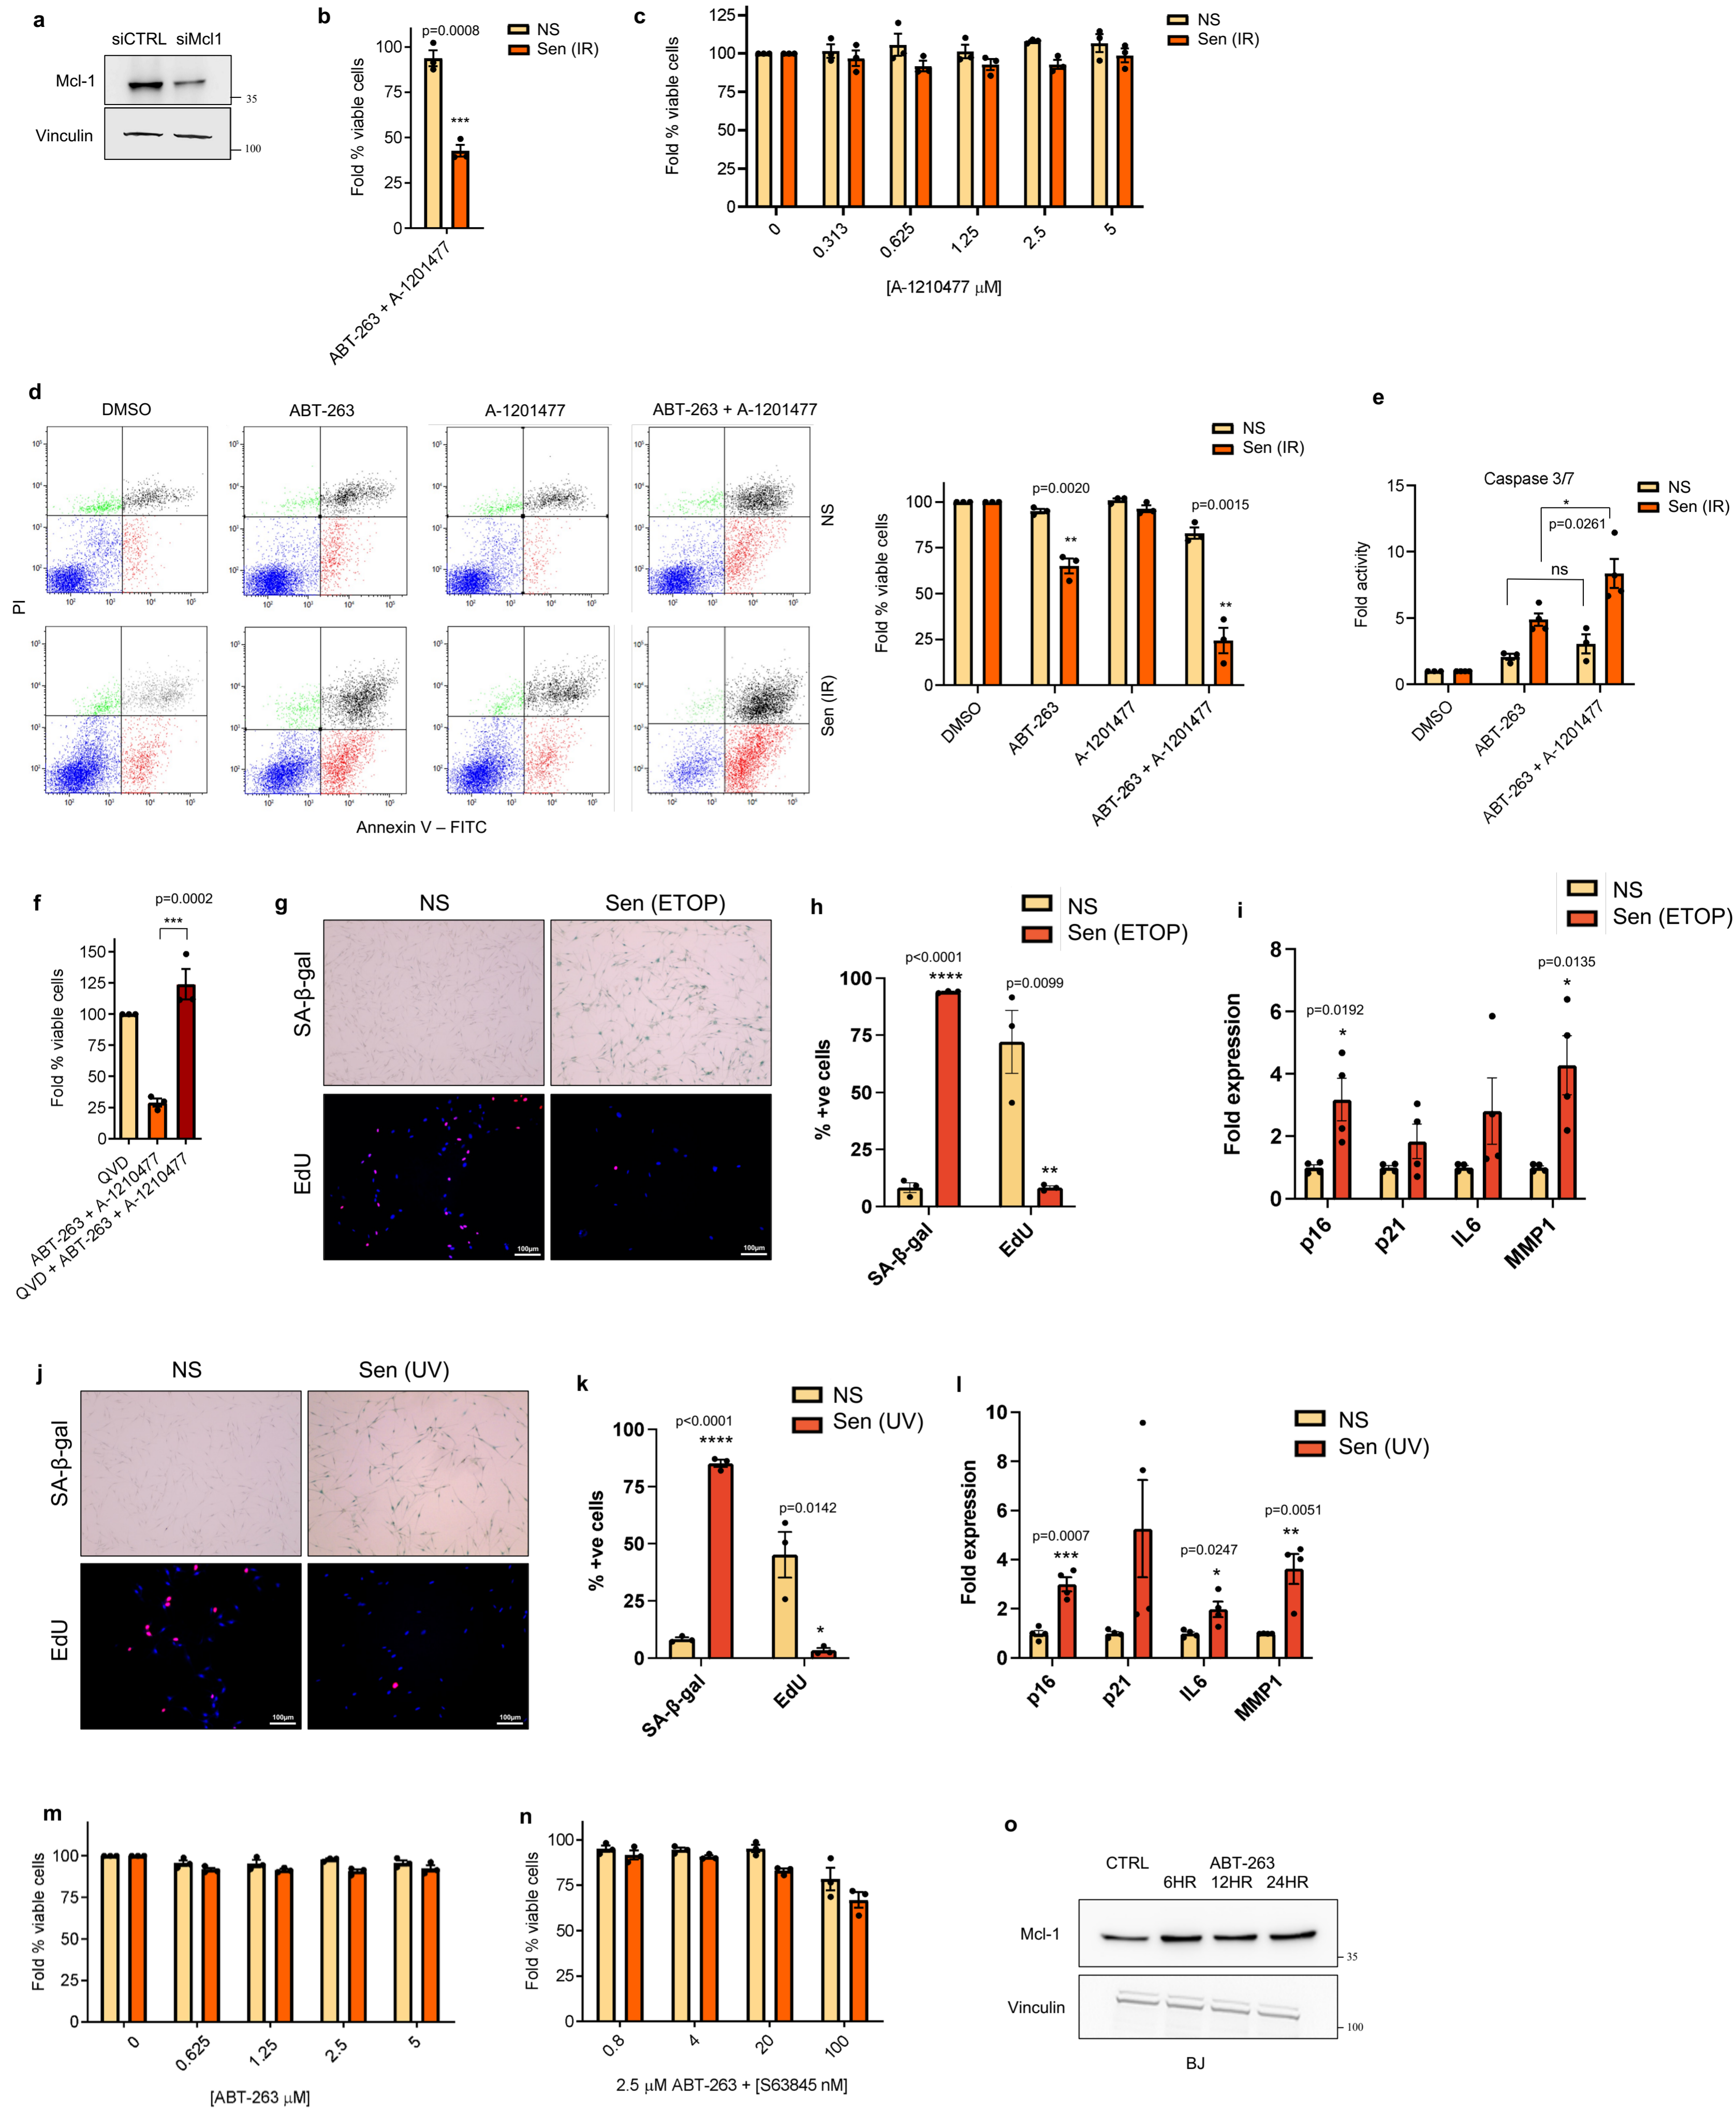

**Supplementary figure 3 (supporting Figure 3). The Mcl-1 inhibitor A-1210477 also synergises with ABT-263 to induce apoptosis in senescent melanocytes.** (A) Immunoblot demonstrating confirmation of reduced Mcl-1 expression in siMcl-1 transfected cells. Viability of non-irradiated (NS) and irradiated (Sen IR) melanocytes treated with (B) 2.5  $\mu$ M ABT-263/ 2.5  $\mu$ M A-1210477 or (C) only A-1210477 for 24 hours. (D) Annexin V/PI flow cytometric analysis and quantification of non-irradiated non-senescent and irradiated senescent melanocytes treated with DMSO, 5  $\mu$ M ABT-263, 5 $\mu$ M A-1201477 or 2.5  $\mu$ M ABT-263/2.5  $\mu$ M A-1210477 for 24 hours. The percentage of viable cells in drug treated cells were normalised to the percentage of DMSO treated viable cells. (E) Caspase 3/7 activity in non-irradiated and irradiated melanocytes treated with DMSO, 5  $\mu$ M ABT-263, or 2.5  $\mu$ M ABT-263/2.5  $\mu$ M A-1210477 for 24 hours. (F) Viability of irradiated melanocytes treated with 20  $\mu$ M QVD, 2.5 $\mu$ M ABT-263/2.5  $\mu$ M A-1210477, or 20  $\mu$ M QVD/2.5 $\mu$ M ABT-263/2.5  $\mu$ M A-1210477 for 24 hours. Viability was normalised to untreated cells. (G) SA- $\beta$ -gal/EdU images and (H) quantification of DMSO treated (NS) and etoposide treated (Sen ETOP) melanocytes, Scale bar = 100  $\mu$ M. (I) mRNA analysis of *p16*, *p21*, *IL6* and *MMP1*. (J) SA- $\beta$ -gal/EdU images and (K) quantification of non-irradiated (NS) and UV-irradiated treated (Sen UV) melanocytes, Scale bar = 100  $\mu$ M. (L) mRNA analysis of *p16*, *p21*, *IL6* and *MMP1*. Viability of non-irradiated (NS) and irradiated (Sen IR) BJ fibroblasts treated with indicated concentrations of (M) ABT-263 and/or (N) ABT-263/S63845. (O) Protein expression of Mcl-1 in irradiated BJ cells treated with 5  $\mu$ M ABT-263 for indicated time points. qPCR expression was normalised using Cq values of tubulin in all experiments. Error bars = S.E.M. \* $p$ <0.05, \*\* $p$ <0.01, \*\*\* $p$ <0.001. For all panels significance was carried out with a two-tailed student's t-test. For all panels, n = 3 independent experiments except 3i and 3l where n = 4 independent experiments.

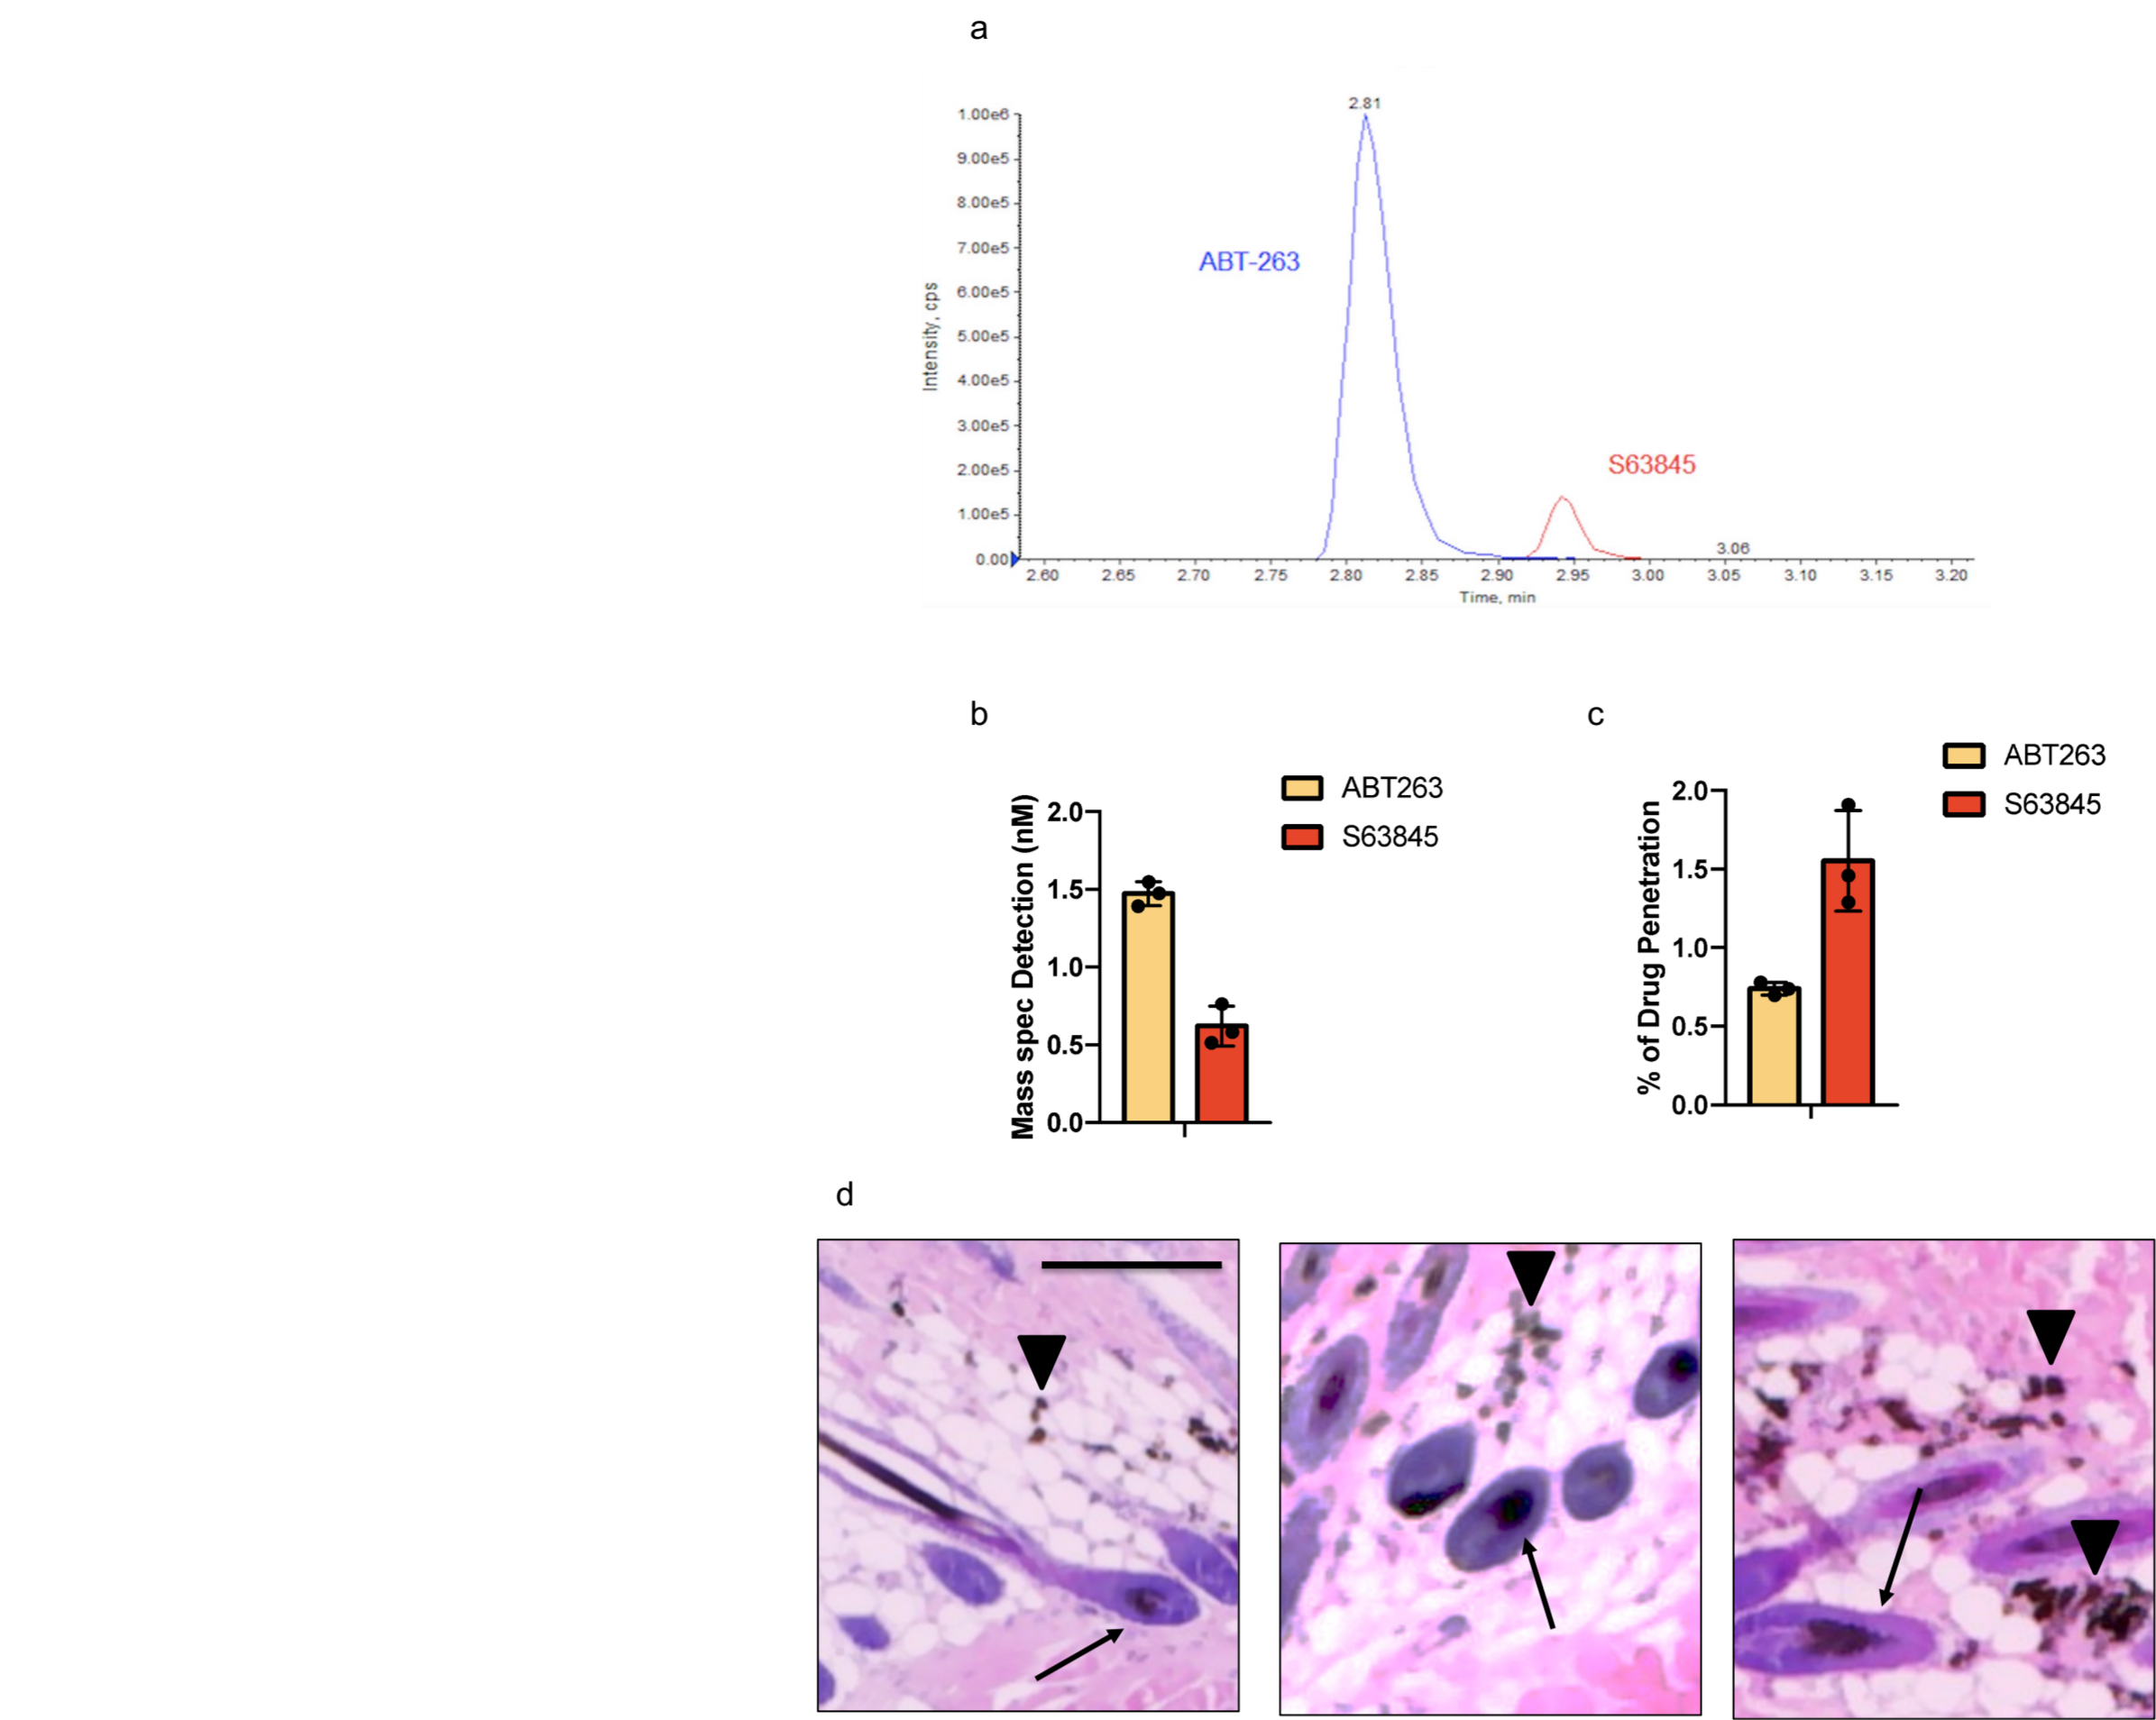

**Supplementary figure 4. Topical application of ABT-263 and S63845 does not kill follicular melanocytes.** (a) A mass chromatogram of ABT-263 and S63845 of mouse skin biopsy. (b) Molar mass of drugs ABT-263 and S63845 detected from skin biopsy, N=3. (c) The percentage of the drug penetration the skin, calculated as Molar mass of drug detected from skin biopsy divided by total molar mass of topical administration, N=3. Error bars = S.D. (D) H and E images of a hair follicle containing follicular pigmented melanocytes (arrow) in mice topically treated with ABT-263 and S63845. Arrowheads show nevi remnants post treatment. The images are representative of 10 individual mice. Scale bar = 250µM.

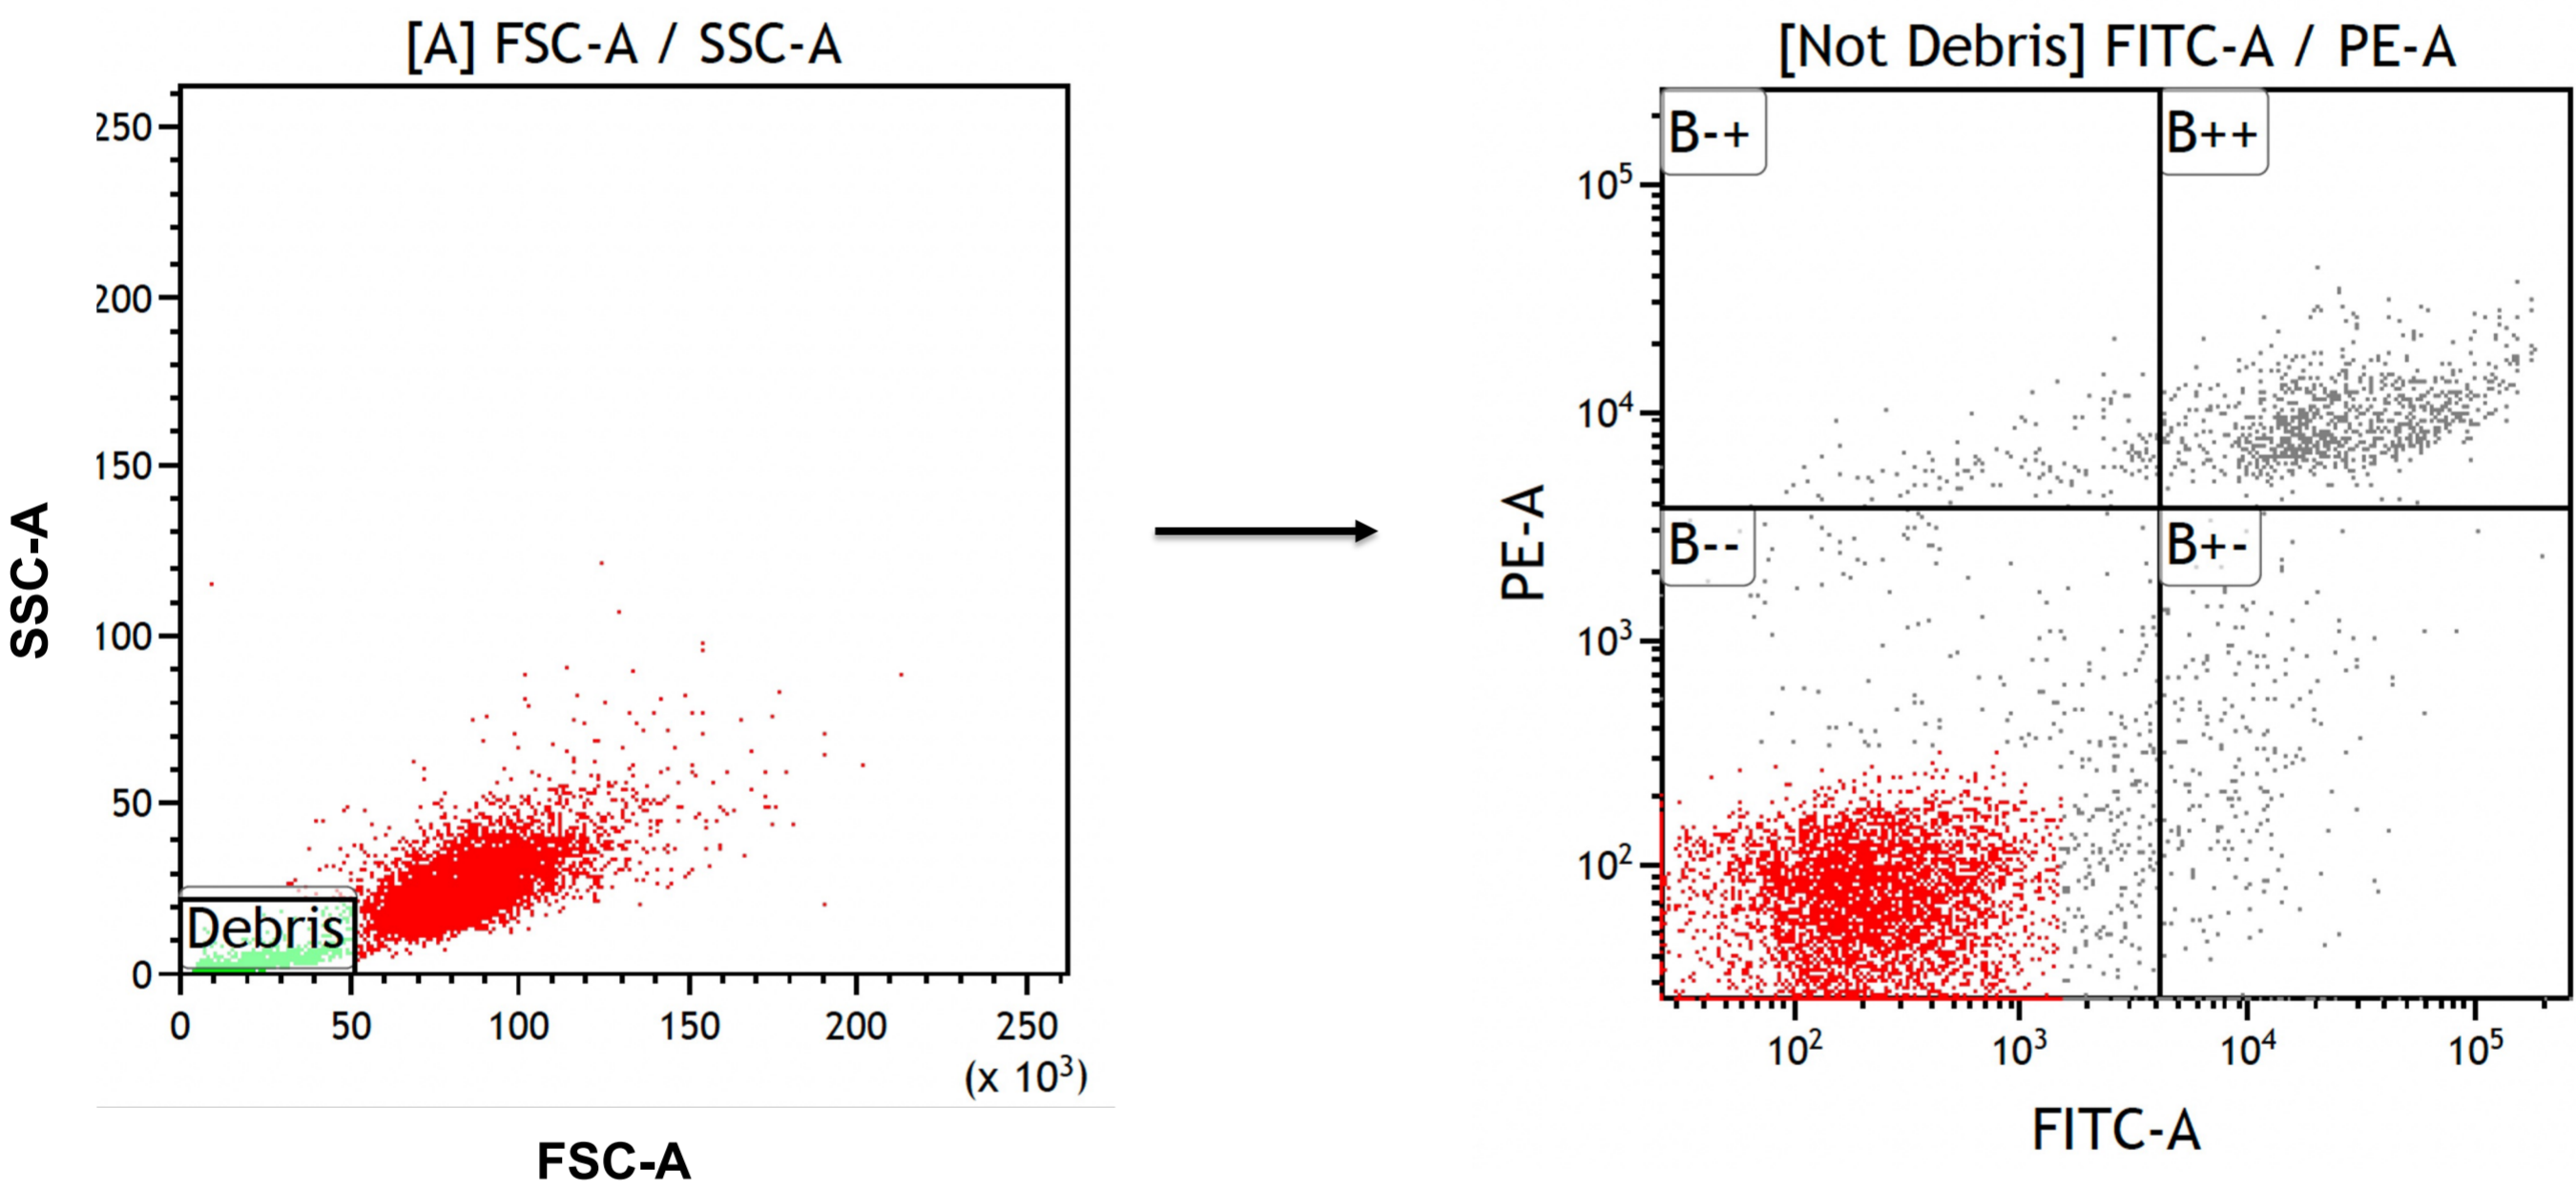

1) Gate out debris and only gate on live cells (red)

2) Analyse Annexin-FITC and PI positivity on live (non debris) cells.

**Supplementary figure 5. Gating strategy for Annexin-Pi flow cytometry experiments.** Debris was first gated out by gating out events with low FSC-A and low SSC-A. Gated cells (red) were then analysed for Annexin V-FITC and PI. Live cells were gated as low annexin V-FITC and low PI (B--). Early apoptotic cells were gated as high Annexin V-FITC and low PI (B+-) and late apoptotic cells were gated as high annexin V-FITC and high PI (B++).

Uncropped blots in supplementary figures.

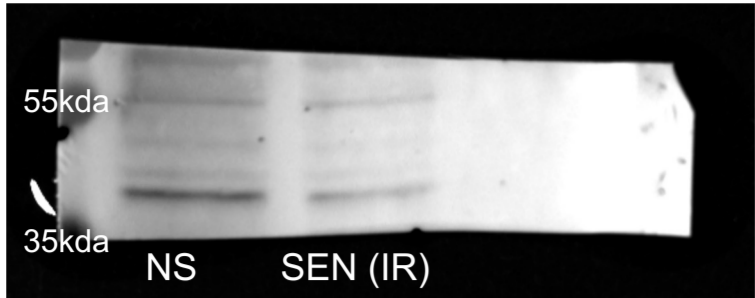

Mcl-1 Supp Figure 1a

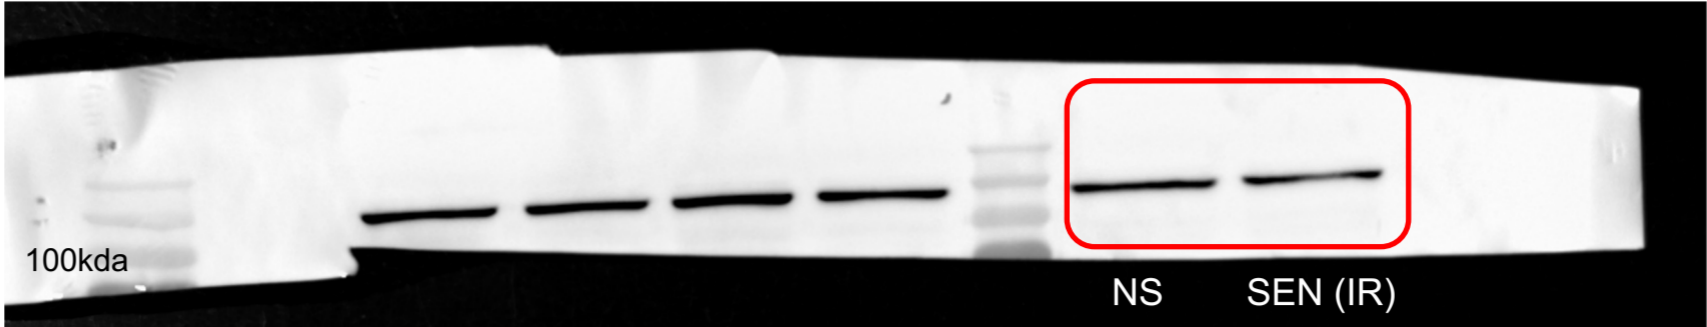

Vinculin Supp Figure 1a

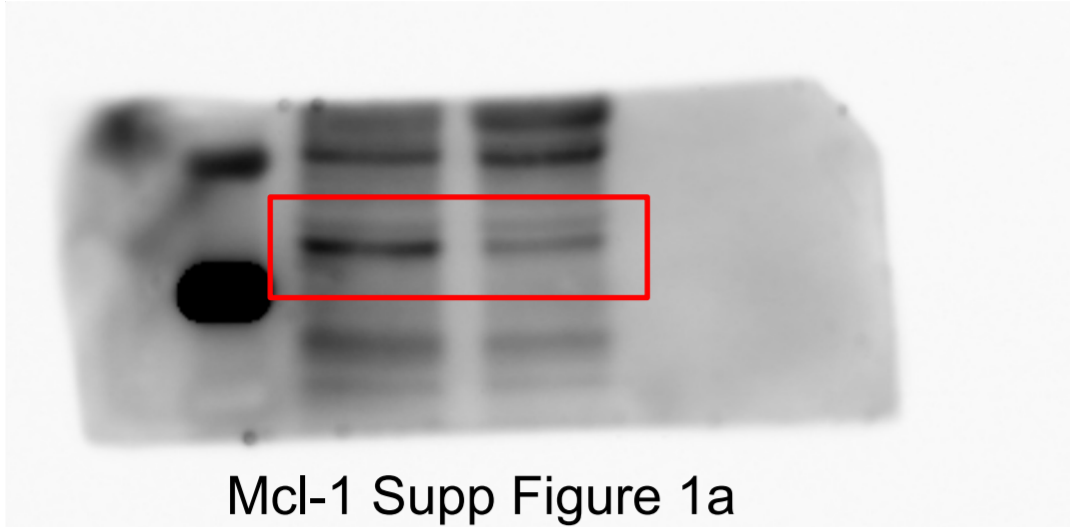

Mcl-1 Supp Figure 1a (repeat 2)

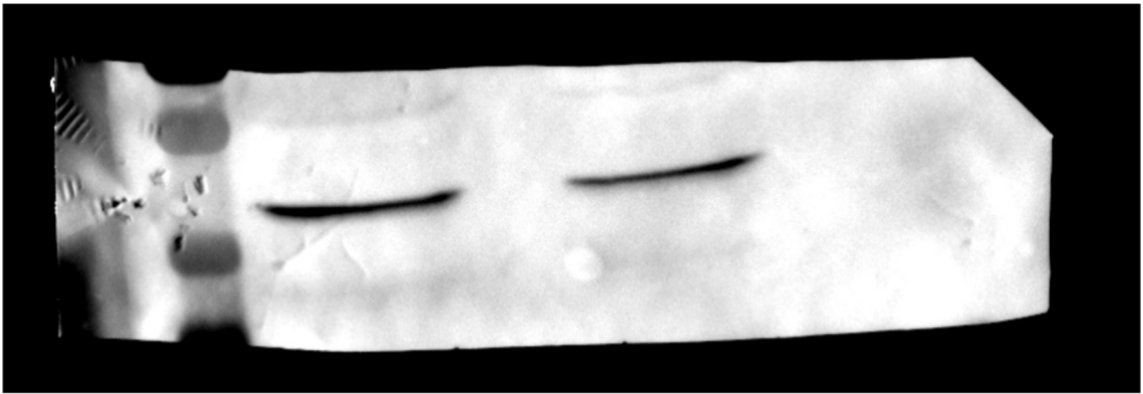

Mcl-1 Supp Figure 1a (repeat 3)

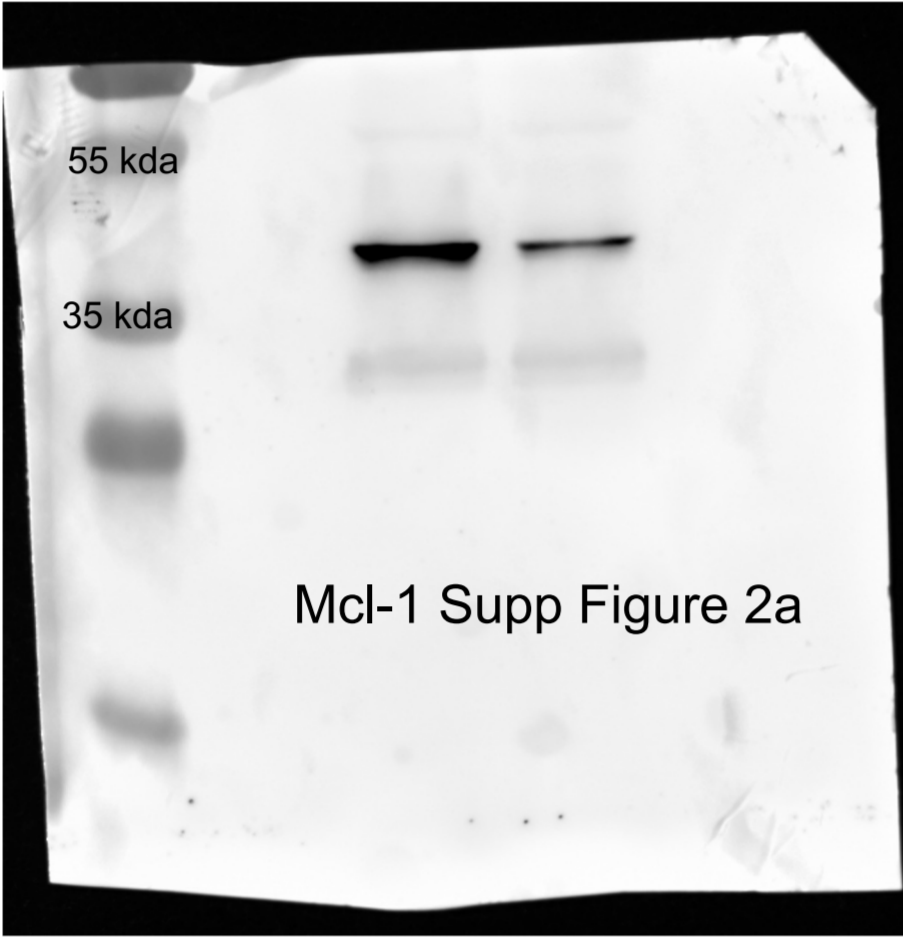

Mcl-1 Supp Figure 2a

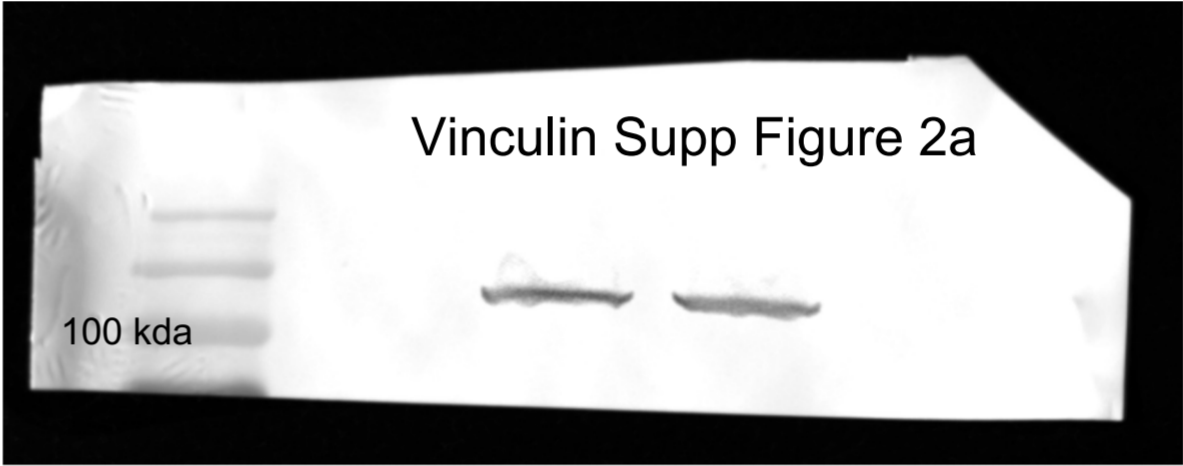

Vinculin Supp Figure 2a

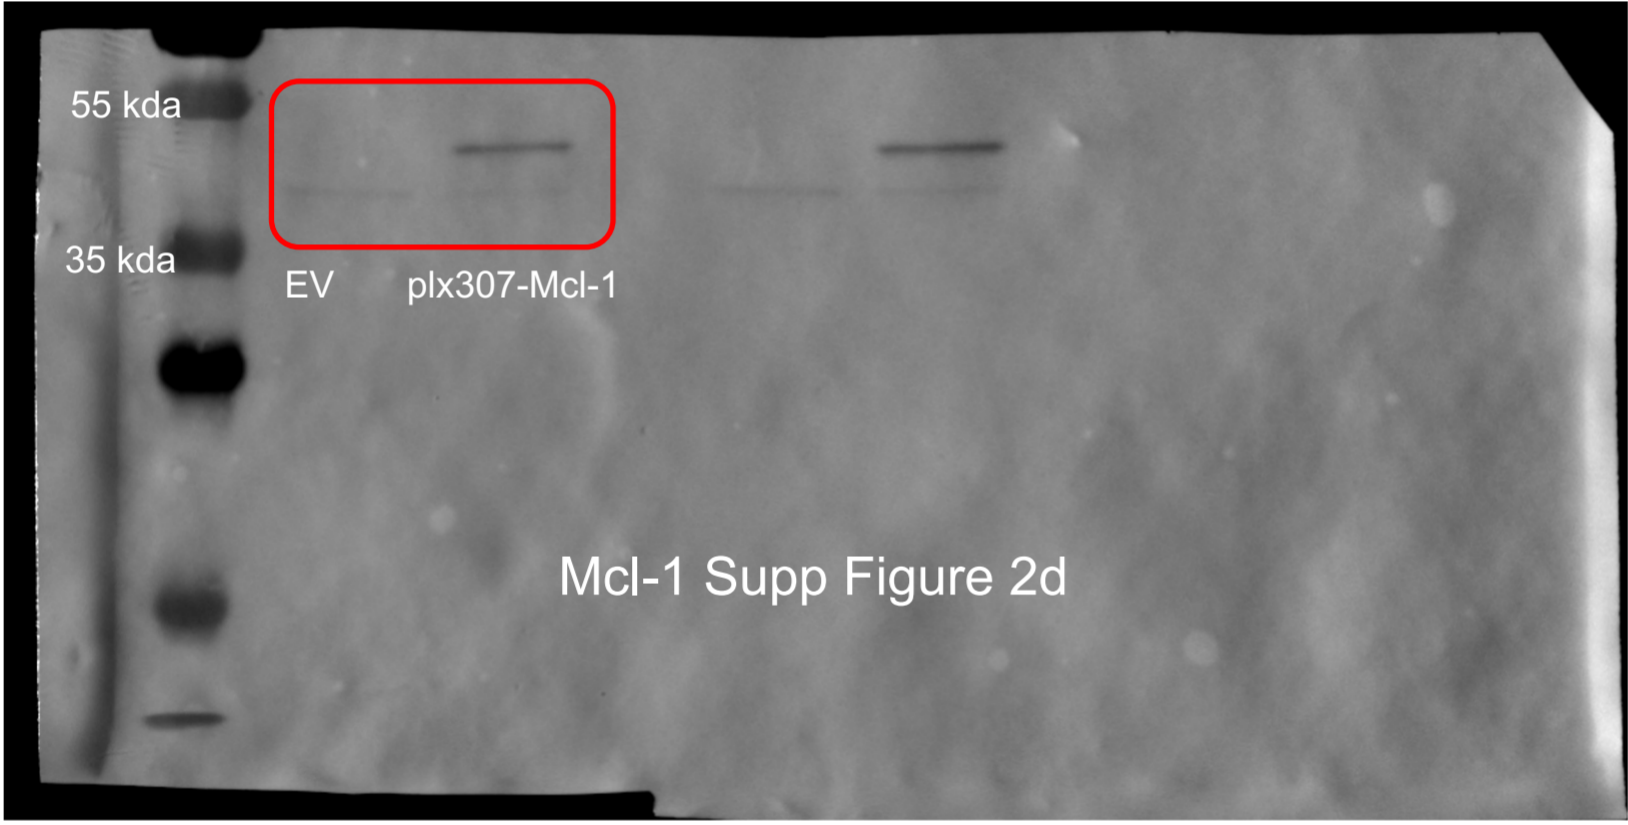

Mcl-1 Supp Figure 2d

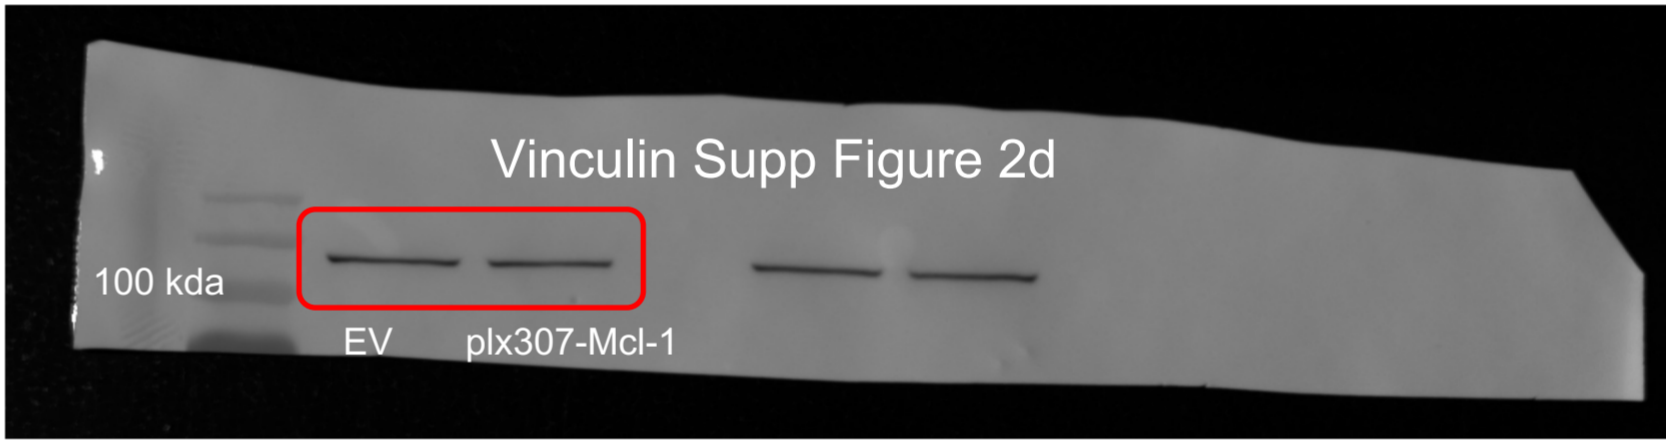

Vinculin Supp Figure 2d

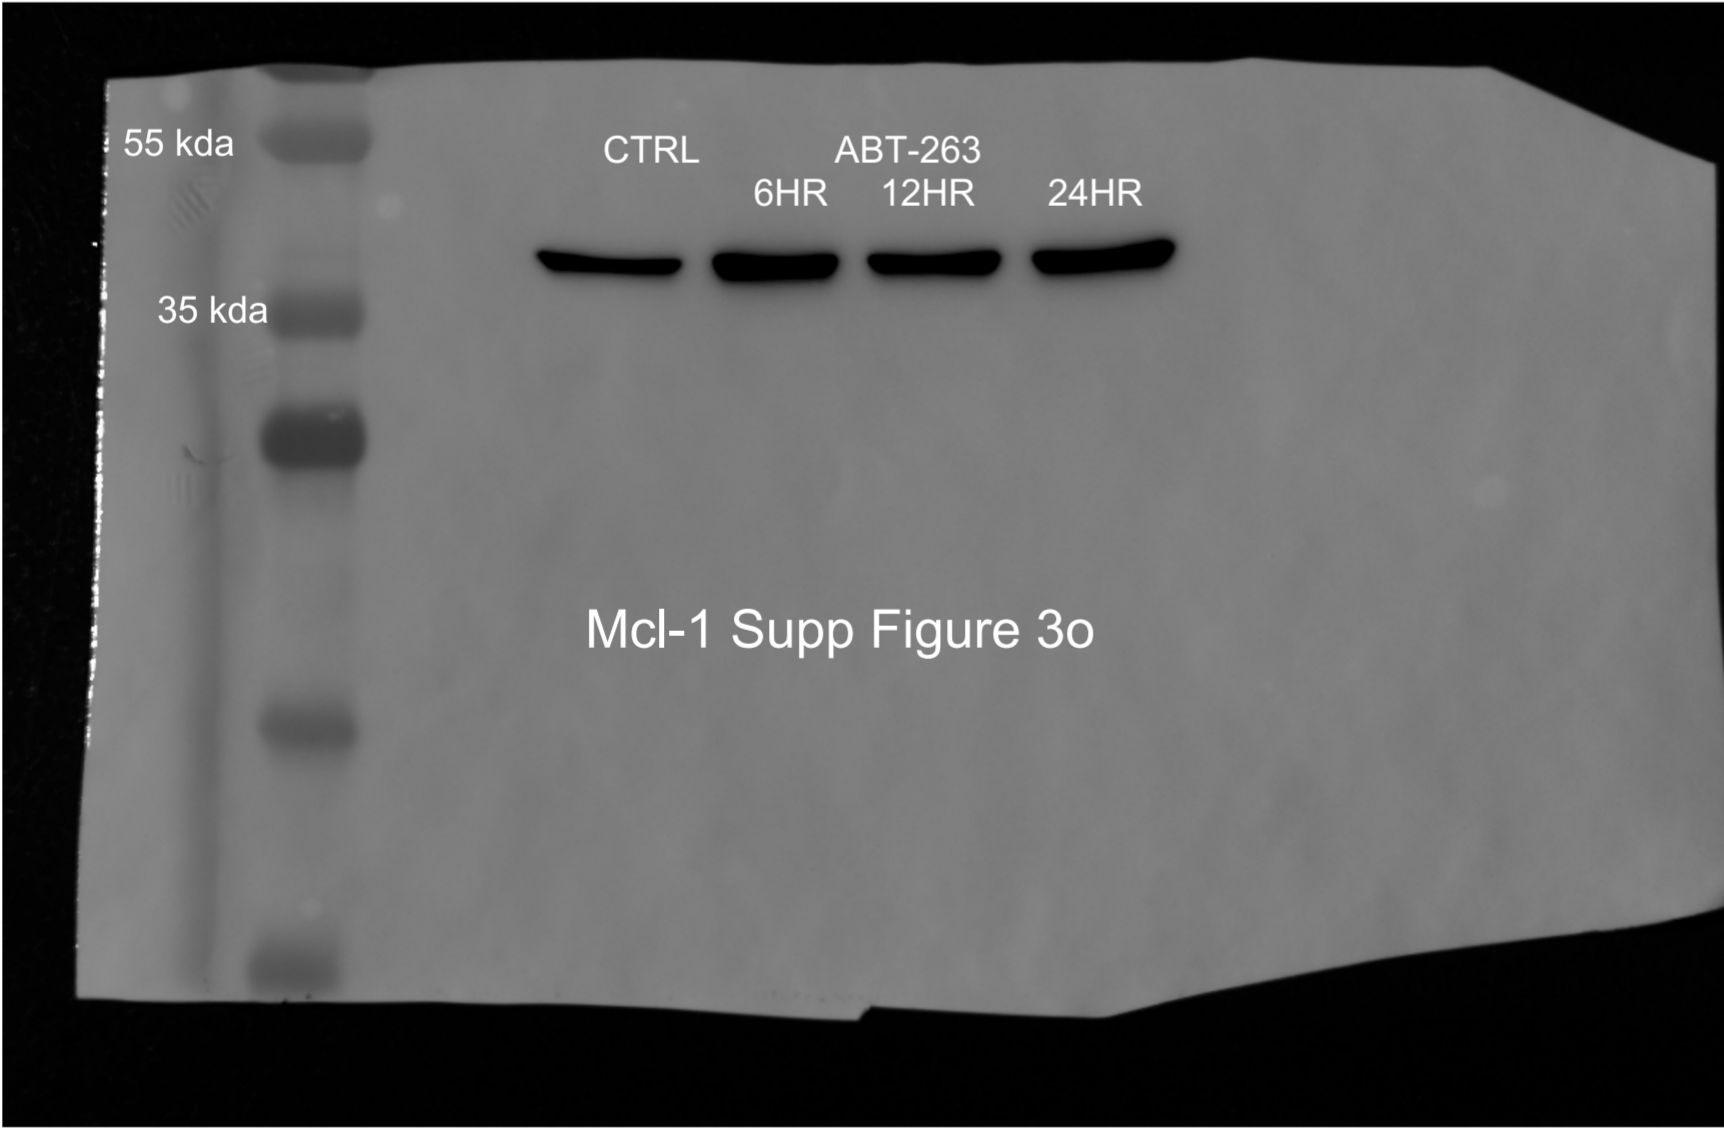

Mcl-1 Supp Figure 3o

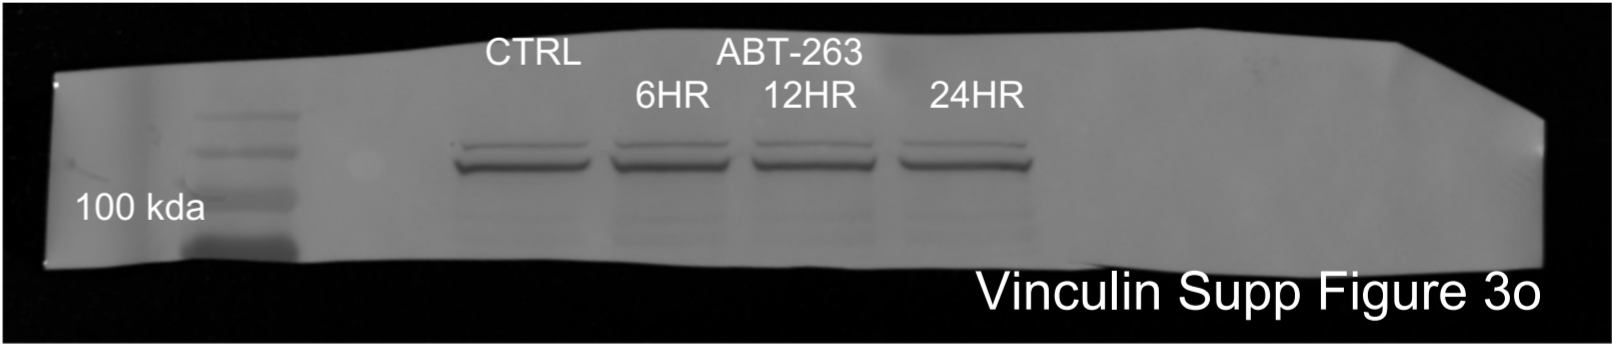

Vinculin Supp Figure 3o
